# Supplementary material for: Adjunctive Phosphodiesterase-4 Inhibitor Therapy Improves Antibiotic Response to Pulmonary Tuberculosis in a Rabbit Model
Source: PubMed Central journal article supplement — eBioMedicine. 2016 Jan 14;4:104–14. doi: 10.1016/j.ebiom.2016.01.015 (PMC4776074; doi:10.1016/j.ebiom.2016.01.015), 2016-01-14
Supplement: mmc1.pdf [file mmc1.pdf]

Supplementary Figure 1. Structure and pharmacokinetics of CC-11050

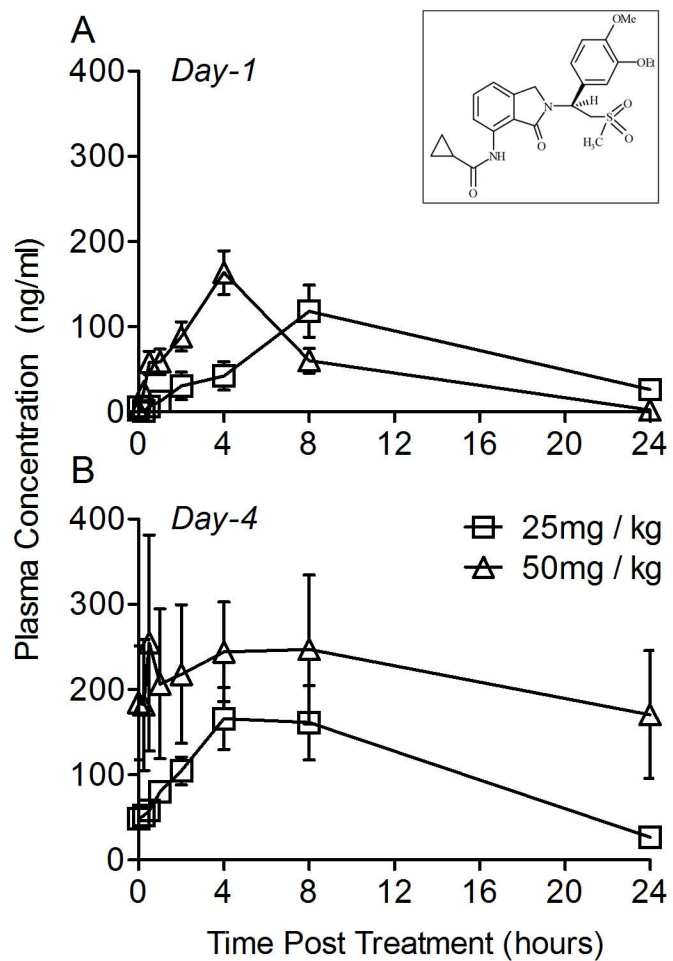

Supplementary Figure 2. Plasma pharmacokinetics of INH

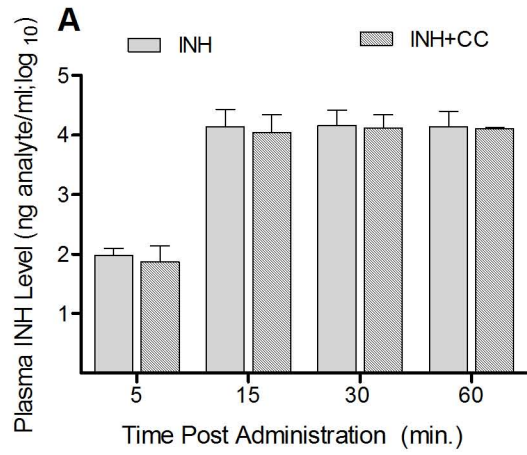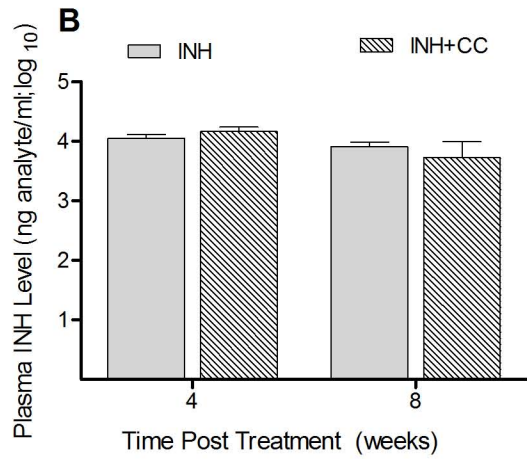

Supplementary Figure 3. In vitro susceptibility of Mtb to INH

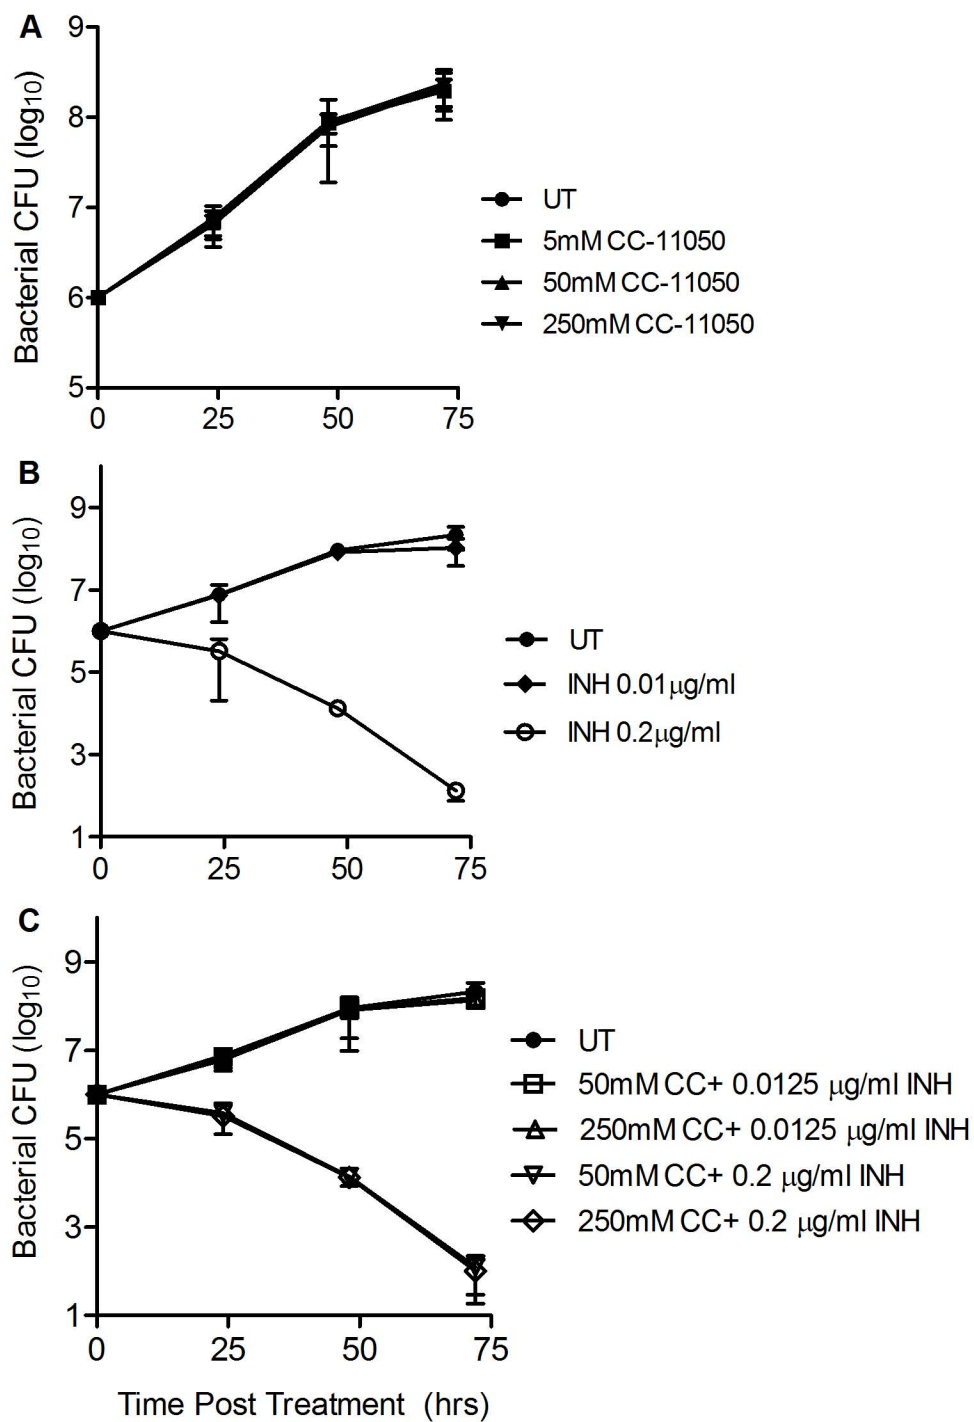

Supplementary Figure 4. Gross weight of the lungs, liver and spleen of Mtb-infected rabbits with or without CC-11050 treatment

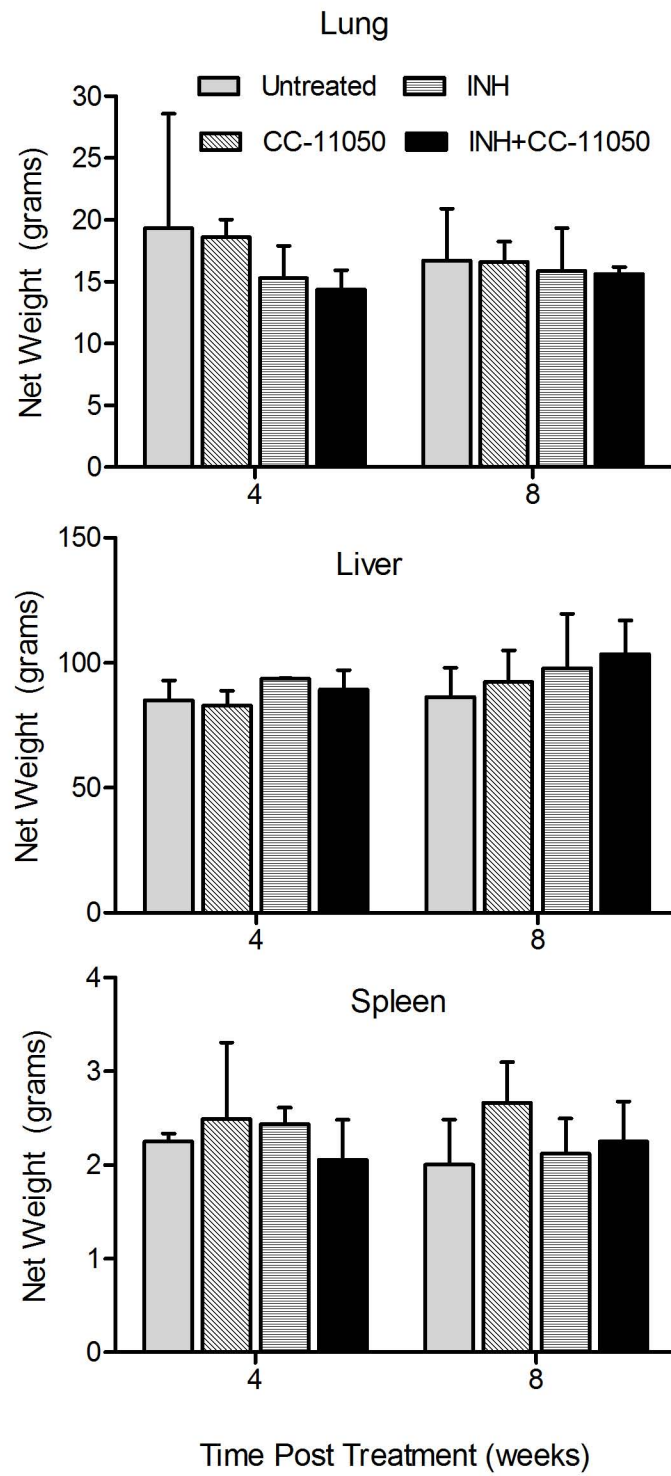

Supplementary Figure 5. Proliferative capacity of CD8+ T cells obtained from Mtb-infected rabbits with or without CC-11050 treatment

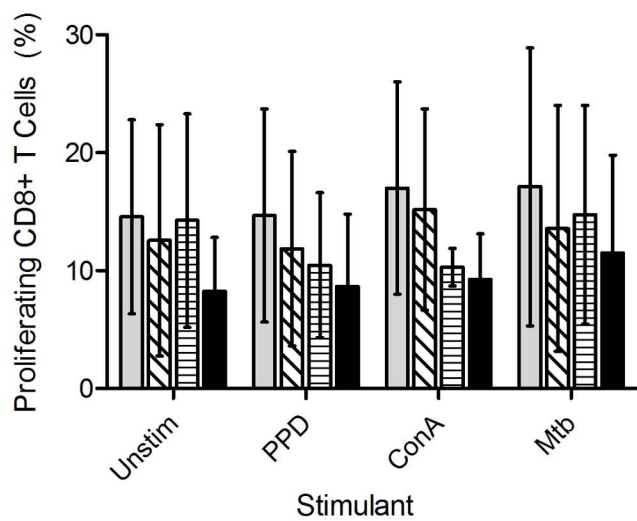

Supplementary Figure 6. Global gene expression analysis of Mtb-infected rabbit lungs with or without CC-11050 treatment

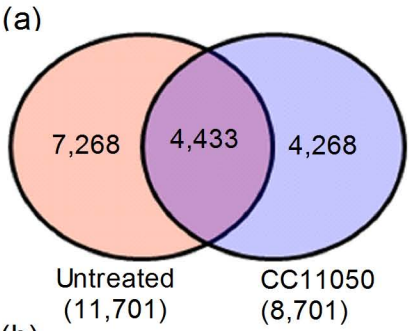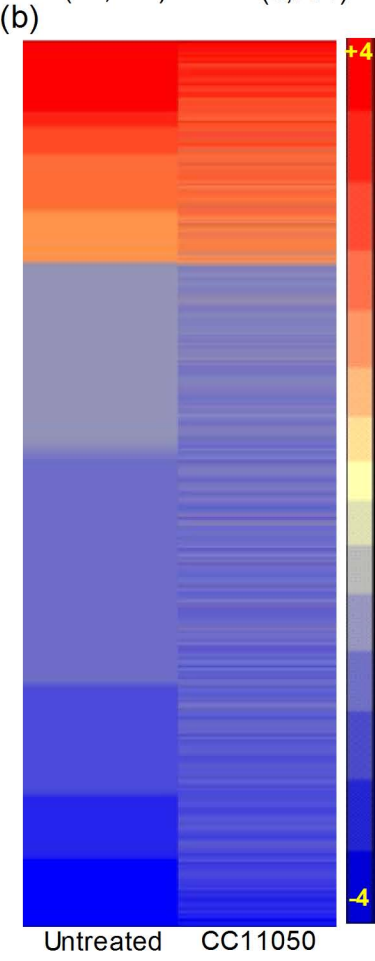

Supplementary Figure 7. Expression profile of genes associated with selected inflammatory response networks in the lungs of Mtb-infected rabbits with or without CC-11050 treatment

- (a). TNF- $\alpha$  regulon network
- (b). Macrophage activation network
- (c). Lung inflammation network

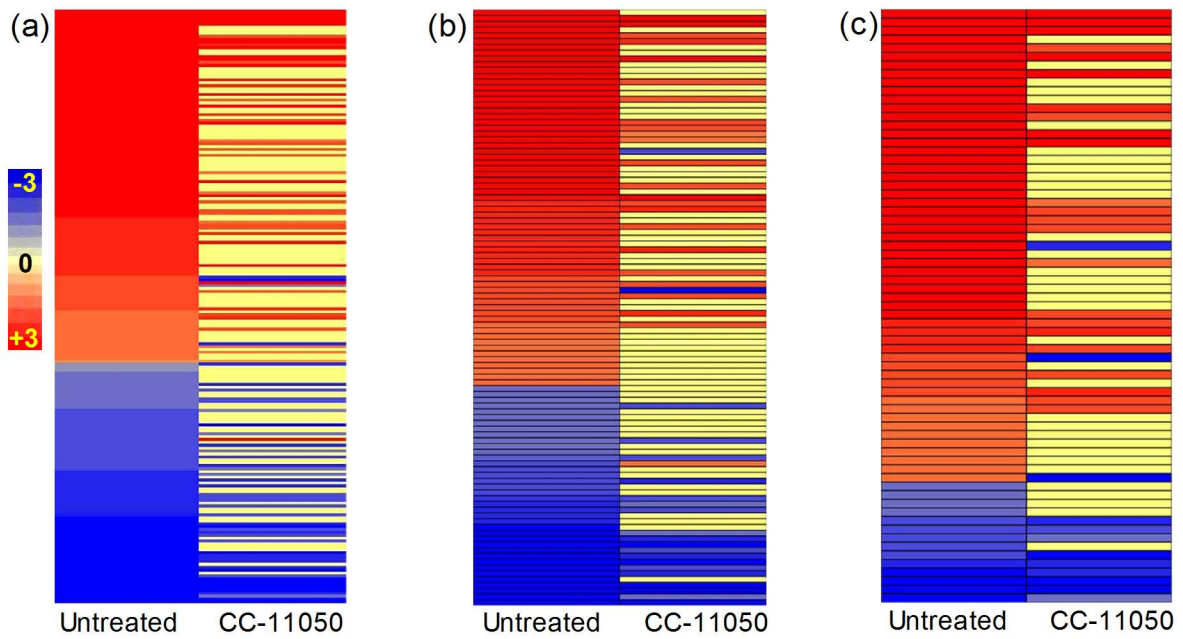

Supplementary Figure 8. Expression profile of genes common to networks associated with inflammatory response in Mtb-infected rabbit lungs with or without CC-11050 treatment

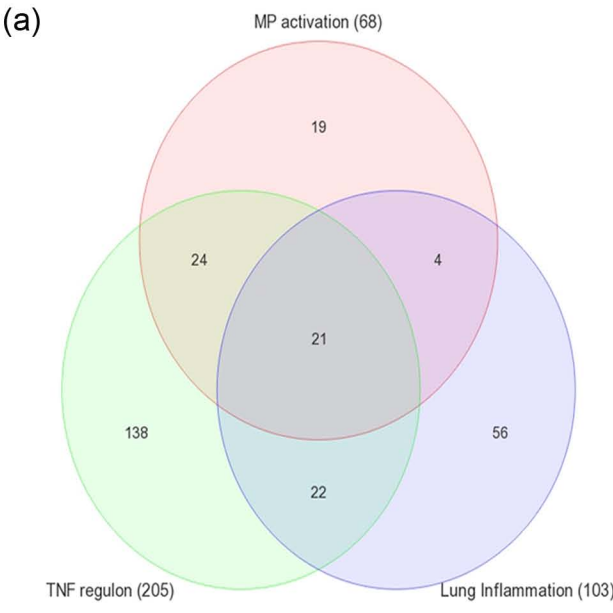

Intensity plot of common genes

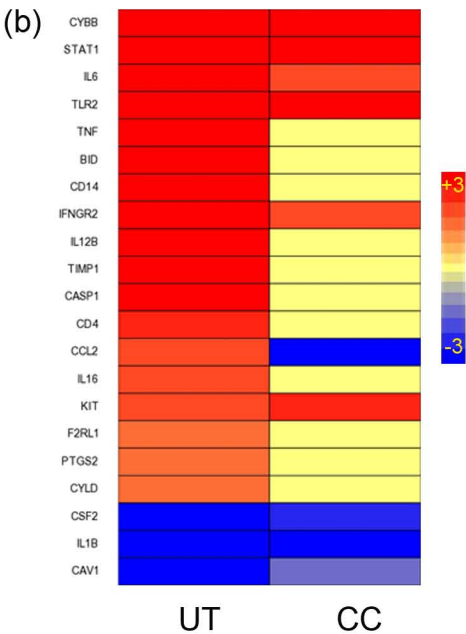



Supplementary Figure 9. Expression profile of genes associated with selected inflammatory response and fibrosis networks in the lungs of Mtb-infected rabbits with or without CC-3052 treatment

- A. TNF- $\alpha$  regulon network
- B. Macrophage activation network
- C. Lung inflammation network
- D. Lung fibrosis network

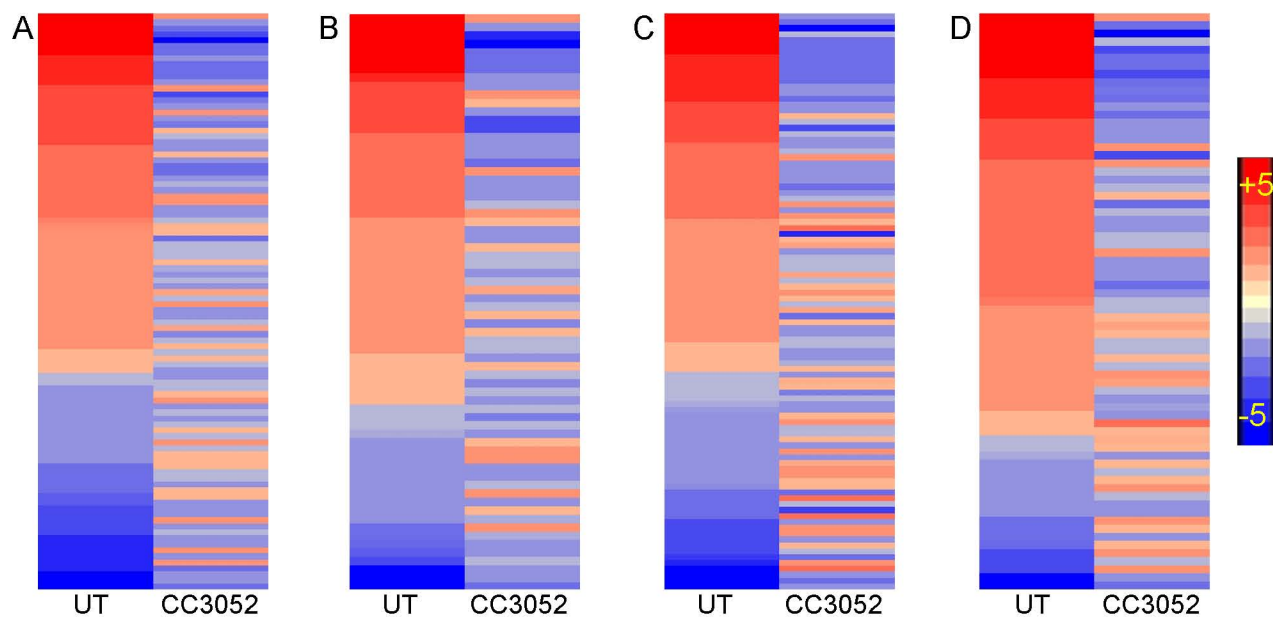

**Supplementary Table 1.** Description of gene specific primers used in this study

| <b>Genes</b>  | <b>Forward primer</b> | <b>Reverse primer</b> | <b>Description</b>                       | <b>Gene ID</b> |
|---------------|-----------------------|-----------------------|------------------------------------------|----------------|
| <i>1L6</i>    | ACTGGCGGAAGTCAATCTGC  | CCTGAAC TTGGCCTGAAGGT | interleukin 6                            | 100008733      |
| <i>CCL3</i>   | TGTGACCTCCACAGCTAGGT  | TGATGACAGCCACTCGGTTG  | chemokine ligand 3                       | 6348           |
| <i>CCR2</i>   | CCTGTATCTCCGCCTTCACT  | CTTACCCGCTCTCGTTGGTA  | chemokine (CC) receptor 2                | 729230         |
| <i>CRP</i>    | GCCAGAGGCAAGCATTATTC  | CGTGTACTTCACCACGTA CT | C-reactive protein                       | NM_001082265.1 |
| <i>CXCR2</i>  | GGTGGTCTCGCTTGTGAAGG  | GTGGCGCTTCTGGATCATCG  | chemokine (CXC) receptor 2               | 100328627      |
| <i>IL12A</i>  | TTCCAGTGCCTTAACCACTC  | TTCACCGTGCTGGTCTTATC  | interleukin 12A                          | 100349007      |
| <i>MCP1</i>   | TTCTGTGCCTGCTGCTCATA  | GGACACTTGGTGCTGTTGAT  | macrophage cationic peptide 1            | 100009115      |
| <i>S100A9</i> | CACGAGGAGATGCACAAGAA  | TTATTTTCCCCACCTGCAAC  | calcium binding protein A9               | 100008704      |
| <i>SPP1</i>   | TCTCCTAACACCGCAGAATG  | TCTGTAAGCCACACTGTCAC  | secreted phosphoprotein 1                | 100008982      |
| <i>MMP2</i>   | CCGATGTCCAGCGAGTAGAC  | CCATCTTCTTCTTCACCTCA  | matrix metalloproteinase,2               | NM_001082209.1 |
| <i>COL1A</i>  | GATGGATTACATGGACCAG   | TCTTGGGAAGGCTCCTGTCT  | collagen, type I                         | 1277           |
| <i>MMP1</i>   | AATGGCTAAGGAAGGCCAAG  | ATCAGGATGATGCGAGTGAC  | matrix metalloproteinase,1               | 100009110      |
| <i>MMP3</i>   | TCTACAACGCCTTTCACAGAC | CCATAGGCACTCCAGAGTTA  | matrix metalloproteinase,3               | NM_001082280.1 |
| <i>MMP9</i>   | CGCCAGCTACGACAAGGACA  | AAGTGGTGGCACACCAGAGG  | matrix metalloproteinase,9               | NM_001082203.1 |
| <i>MMP12</i>  | CCA ACTGGCTGTGACCACAA | AGCAGCCTCAATGCCTGAAG  | matrix metalloproteinase,12              | NM_001082771.1 |
| <i>MMP13</i>  | TCTTGAGCTGGACTCATTGC  | GCAGGATTCAGAGGATGGTA  | matrix metalloproteinase,13              | NM_001082037.1 |
| <i>MMP14</i>  | CCACAAGATGCCTCCTCAAC  | GTAGCCGTCCATCACTTGGT  | matrix metalloproteinase,14              | NM_001082793.1 |
| <i>DCN</i>    | CAAGGTCTTCCTCCTTCTCT  | ACCACCAGGTA CTCCGATAA | decorin                                  | 100009171      |
| <i>COL3A1</i> | TAGGAGGACTCGCAGGCTAT  | GCAGGACCAGATGGACCTAT  | collagen, type III, alpha 1              | 1281           |
| <i>MMP8</i>   | GCATTCAGGCCATCTATGGA  | TGTAGCTGAGGATGCCTTCT  | matrix metalloproteinase,8               | 4317           |
| <i>GAPDH</i>  | GGCGTGAACCACGAGAAGTA  | TCCACAATGCCGAAGTGGTC  | glyceraldehyde 3-phosphate dehydrogenase | 100009074      |

**Supplementary Table 2a.** Pharmacokinetics of CC-11050 in rabbits

| Dose (mg/kg) | Day | C <sub>max</sub> (ng/ml) at T <sub>max</sub> | AUC <sub>24</sub> (ng*h/ml) | Accumulation Ratio* |
|--------------|-----|----------------------------------------------|-----------------------------|---------------------|
| 25           | 1   | 118 +/- 52.8                                 | 1370 +/- 371                | NC                  |
| 25           | 4   | 214 +/- 33.7                                 | 2260 +/- 551                | 1.77 +/- 0.71       |
| 50           | 1   | 163 +/- 44.8                                 | 2380 +/- 702                | NC                  |
| 50           | 4   | 280 +/- 126                                  | 5130 +/- 3240               | 2.37 +/- 1.86       |

\*Day 4 AUC<sub>24h</sub>/Day 1 AUC<sub>24h</sub>; NC-not calculated.

**Supplementary Table 2b.** Individual plasma concentrations for CC-11050 and INH in rabbits after two weeks of treatment

|                        | <b>Concentration (ng/ml; Mean (SD))</b> |
|------------------------|-----------------------------------------|
| <b>Treatment Group</b> | <b>CC-11050</b>                         |
| INH only               | BLOQ                                    |
| INH+CC-11050           | 118.02                                  |
| Untreated              | BLOQ                                    |
| CC-11050 only          | 178.94                                  |

BLOQ: below the level of quantification.

**Supplement Table 3.** Mean CFU (log10) from individual rabbits

| Time (wks) | Untreated    |      |      |      |      |      |      |      |     |     |
|------------|--------------|------|------|------|------|------|------|------|-----|-----|
| 0          | 2.9          | 2.8  | 3.18 | 3.12 | 3.48 | 3.72 | 3.77 | 3.5  | 3.4 | 3.5 |
| 4          | 7.37         | 7.7  | 7.22 | 6.09 | 7.12 | 6    |      |      |     |     |
| 8          | 6.48         | 7.66 | 7.63 | 5.66 | 5.4  | 6.8  |      |      |     |     |
| 12         | 5.43         | 6    | 6.8  | 6.59 | 8.5  | 7.84 | 6.02 |      |     |     |
|            |              |      |      |      |      |      |      |      |     |     |
| Time (wks) | CC-11050     |      |      |      |      |      |      |      |     |     |
| 0          | 2.9          | 2.8  | 3.18 | 3.12 | 3.48 | 3.72 | 3.77 | 3.5  | 3.4 | 3.5 |
| 4          | 7.37         | 7.7  | 7.22 | 6.09 | 7.12 | 6    |      |      |     |     |
| 8          | 7.12         | 7.02 | 6.16 | 6.9  | 6.97 | 5    |      |      |     |     |
| 12         | 7.1          | 5.47 | 5.26 | 6    | 5.86 | 5    | 5.71 | 4.52 |     |     |
|            |              |      |      |      |      |      |      |      |     |     |
| Time (wks) | INH          |      |      |      |      |      |      |      |     |     |
| 0          | 2.9          | 2.8  | 3.18 | 3.12 | 3.48 | 3.72 | 3.77 | 3.5  | 3.4 | 3.5 |
| 4          | 7.37         | 7.7  | 7.22 | 6.09 | 7.12 | 6    |      |      |     |     |
| 8          | 6.3          | 5.92 | 7.41 | 6.41 | 6    | 5.61 |      |      |     |     |
| 12         | 5.14         | 4.6  | 6    | 5.61 | 5.99 | 5.3  | 5.21 | 4.7  |     |     |
|            |              |      |      |      |      |      |      |      |     |     |
| Time (wks) | INH+CC-11050 |      |      |      |      |      |      |      |     |     |
| 0          | 2.9          | 2.8  | 3.18 | 3.12 | 3.48 | 3.72 | 3.77 | 3.5  | 3.4 | 3.5 |
| 4          | 7.37         | 7.7  | 7.22 | 6.09 | 7.12 | 6    |      |      |     |     |
| 8          | 5.68         | 6.09 | 6.03 | 5    | 5.91 | 4.3  |      |      |     |     |
| 12         | 5.16         | 3.17 | 3.92 | 3.81 | 3.62 | 5.2  | 4.2  | 4.9  |     |     |

**Supplementary Table 4.** qPCR validation of microarray gene expression

| <b>Genes</b>  | <b>qPCR (se)</b> | <b>Array</b> |
|---------------|------------------|--------------|
| <i>1L6</i>    | 1.071 (0.153)    | 1.85         |
| <i>CCL3</i>   | 1.812 (0.395)    | 2.1          |
| <i>CCR2</i>   | 1.584 (0.289)    | 1.32         |
| <i>CRP</i>    | 5.804 (0.649)    | 1.76         |
| <i>CXCR2</i>  | 1.595 (0.309)    | 1.51         |
| <i>IL12A</i>  | 1.264 (0.043)    | 2.28         |
| <i>MCP1</i>   | -1.130 (0.044)   | -3.02        |
| <i>S100A9</i> | 1.1638 (0.259)   | 2.2          |
| <i>SPP1</i>   | -2.08 (0.829)    | -2.16        |

**Supplementary Table 5:** Top ten SDEG in Mtb infected untreated or CC-11050 treated rabbit lungs

***Untreated***

| <u>Up regulated</u> | <u>Exp. Value</u> |
|---------------------|-------------------|
| GZMA                | 711.230           |
| MMP1                | 109.323           |
| CXCL9               | 88.635            |
| CLEC4A              | 61.612            |
| FAM26F              | 43.008            |
| ATP12A              | 36.495            |
| ATP1A4              | 34.821            |
| SLAMF7              | 34.075            |
| GZMB                | 32.580            |
| CXCL13              | 27.808            |

| <u>Down regulated</u> | <u>Exp. Value</u> |
|-----------------------|-------------------|
| CREG2                 | -24.422           |
| NTS                   | -23.653           |
| SLC16A12              | -16.857           |
| GPM6A                 | -16.848           |
| UPK1B                 | -15.987           |
| ITLN1                 | -12.634           |
| SLC26A3               | -12.441           |
| SCG5                  | -11.666           |
| SRL                   | -11.495           |
| SEMA3E                | -11.303           |

***CC-11050 treated***

| <u>Up regulated</u> | <u>Exp. Value</u> |
|---------------------|-------------------|
| GZMA                | 77.496            |
| CYLC2               | 27.298            |
| USP12               | 25.658            |
| SLC17A6             | 23.049            |
| CXCL9               | 16.566            |
| PNLIP               | 16.061            |
| SLC44A5             | 11.997            |
| MMP1                | 11.329            |
| MDGA2               | 10.783            |
| CLEC4A              | 10.433            |

| <u>Down regulated</u> | <u>Exp. Value</u> |
|-----------------------|-------------------|
| ITLN1                 | -17.702           |
| ALDH1A2               | -16.497           |
| NTS                   | -9.257            |

|               |        |
|---------------|--------|
| <i>ME3</i>    | -8.198 |
| <i>PHYH</i>   | -8.090 |
| <i>SPINK2</i> | -7.898 |
| <i>MYOT</i>   | -7.119 |
| <i>CPVL</i>   | -6.866 |
| <i>UPK1B</i>  | -6.400 |
| <i>CXCL8</i>  | -6.328 |

**Supplementary Table 6.** List of genes and their expression levels in selected networks

| <b><i>SDEG involved<br/>in TNFa regulon<br/>network</i></b> |                         |                                    |
|-------------------------------------------------------------|-------------------------|------------------------------------|
| <b><i>Symbol</i></b>                                        | <b><i>Untreated</i></b> | <b><i>CC-11050<br/>treated</i></b> |
| <i>CXCL13</i>                                               | 27.8077                 | 5.37504                            |
| <i>CLEC4E</i>                                               | 18.9198                 | 4.2693                             |
| <i>CYBB</i>                                                 | 14.4262                 | 3.38956                            |
| <i>STAT1</i>                                                | 14.0654                 | 5.23444                            |
| <i>OAS2</i>                                                 | 13.9082                 | 5.04546                            |
| <i>KYNU</i>                                                 | 12.7519                 | 2.74291                            |
| <i>CCL5</i>                                                 | 12.358                  | 0                                  |
| <i>CFB</i>                                                  | 12.2153                 | 0                                  |
| <i>FPR1</i>                                                 | 11.3865                 | 0                                  |
| <i>IL6</i>                                                  | 11.1379                 | 1.84644                            |
| <i>TNFSF13B</i>                                             | 10.8439                 | 4.70939                            |
| <i>CD5</i>                                                  | 10.8011                 | 3.02577                            |
| <i>NCF1</i>                                                 | 10.7237                 | 2.39023                            |
| <i>CXCL10</i>                                               | 10.0354                 | 3.58632                            |
| <i>PLAU</i>                                                 | 9.75851                 | 0                                  |
| <i>SPP1</i>                                                 | 9.57236                 | 0                                  |
| <i>TLR2</i>                                                 | 9.34011                 | 3.80716                            |
| <i>RGS1</i>                                                 | 9.16372                 | 3.54841                            |
| <i>TF</i>                                                   | 7.67308                 | 1.85165                            |
| <i>CTSB</i>                                                 | 7.32619                 | 2.52052                            |
| <i>GUSB</i>                                                 | 7.27346                 | 0                                  |
| <i>SPHK1</i>                                                | 7.27082                 | 0                                  |



|                |         |         |
|----------------|---------|---------|
| <i>TNF</i>     | 7.24064 | 0       |
| <i>CD86</i>    | 6.10309 | 0       |
| <i>PSMB9</i>   | 5.93947 | 2.90161 |
| <i>RUNX2</i>   | 5.87558 | 0       |
| <i>IL18BP</i>  | 5.67449 | 2.28553 |
| <i>BCL2A1</i>  | 5.63305 | 0       |
| <i>TAP1</i>    | 5.5465  | 0       |
| <i>CD274</i>   | 5.3788  | 2.54051 |
| <i>CD3E</i>    | 5.15547 | 0       |
| <i>CD40LG</i>  | 4.76094 | 1.87891 |
| <i>BID</i>     | 4.73392 | 0       |
| <i>CD69</i>    | 4.71329 | 8.93939 |
| <i>CTSS</i>    | 4.69755 | 0       |
| <i>IL21R</i>   | 4.50233 | 0       |
| <i>HLA-DRA</i> | 4.48618 | 2.49508 |
| <i>CD14</i>    | 4.38048 | 0       |
| <i>PSMB10</i>  | 4.26662 | 1.88834 |
| <i>GRIA1</i>   | 4.02756 | 4.20764 |
| <i>IRF5</i>    | 3.8695  | 0       |
| <i>BIRC3</i>   | 3.83273 | 0       |
| <i>ITGB2</i>   | 3.83038 | 0       |
| <i>S100A8</i>  | 3.79368 | 0       |
| <i>LTB</i>     | 3.72229 | 0       |
| <i>CD28</i>    | 3.62874 | 1.47712 |
| <i>IRF8</i>    | 3.52603 | 2.00602 |
| <i>IRF1</i>    | 3.47754 | 0       |
| <i>IFNGR2</i>  | 3.43932 | 1.8924  |
| <i>CSF1R</i>   | 3.43681 | 0       |

|                 |         |         |
|-----------------|---------|---------|
| <i>B2M</i>      | 3.3902  | 1.81578 |
| <i>INHBA</i>    | 3.37736 | 0       |
| <i>ACSL1</i>    | 3.30325 | 0       |
| <i>NFKBIE</i>   | 3.26748 | 0       |
| <i>HLA-C</i>    | 3.24267 | 0       |
| <i>IL12B</i>    | 3.1419  | 0       |
| <i>ITGAL</i>    | 3.13904 | 1.49532 |
| <i>TIMP1</i>    | 2.98939 | 0       |
| <i>PSMB8</i>    | 2.9789  | 0       |
| <i>NPPA</i>     | 2.9505  | 3.16043 |
| <i>C11orf82</i> | 2.92906 | 0       |
| <i>GRN</i>      | 2.90628 | 0       |
| <i>CD40</i>     | 2.88273 | 0       |
| <i>FBXO32</i>   | 2.87271 | 1.50951 |
| <i>AK2</i>      | 2.85238 | 3.89079 |
| <i>CIITA</i>    | 2.80008 | 0       |
| <i>SLC7A8</i>   | 2.77249 | 1.96136 |
| <i>ITGB7</i>    | 2.75781 | 0       |
| <i>CASP1</i>    | 2.73833 | 0       |
| <i>RRM2</i>     | 2.69883 | 1.99582 |
| <i>IL2RA</i>    | 2.57588 | 1.60276 |
| <i>HEXB</i>     | 2.55882 | 0       |
| <i>NCF2</i>     | 2.46975 | 0       |
| <i>PSME2</i>    | 2.44397 | 1.50133 |
| <i>TNFSF15</i>  | 2.37462 | 1.58851 |
| <i>RFTN1</i>    | 2.33682 | 1.92651 |
| <i>SERPINB9</i> | 2.33163 | 0       |
| <i>IRF7</i>     | 2.30504 | 2.19894 |

|                |         |          |
|----------------|---------|----------|
| <i>NFKB2</i>   | 2.29707 | 0        |
| <i>CTSZ</i>    | 2.25932 | 0        |
| <i>LRRC8C</i>  | 2.2593  | 2.7555   |
| <i>PDGFRA</i>  | 2.23633 | 0        |
| <i>IDO1</i>    | 2.18388 | 0        |
| <i>TIMP2</i>   | 2.17808 | 0        |
| <i>CD4</i>     | 2.16589 | 0        |
| <i>IL4R</i>    | 2.14877 | 0        |
| <i>PCK2</i>    | 2.12973 | 0        |
| <i>CTLA4</i>   | 2.10674 | 0        |
| <i>COL1A2</i>  | 2.08269 | 3.17903  |
| <i>LITAF</i>   | 2.07957 | 0        |
| <i>TNFRSF9</i> | 2.06428 | 0        |
| <i>WISP1</i>   | 2.04103 | 0        |
| <i>MCL1</i>    | 1.952   | -2.27535 |
| <i>CCL2</i>    | 1.94896 | -3.0179  |
| <i>EDN1</i>    | 1.90454 | 2.75582  |
| <i>SMPDL3A</i> | 1.90401 | -1.46037 |
| <i>IL16</i>    | 1.79424 | 0        |
| <i>PIGR</i>    | 1.77355 | 1.58886  |
| <i>PSME1</i>   | 1.75066 | 0        |
| <i>TBX21</i>   | 1.71805 | 0        |
| <i>TAPBP</i>   | 1.66906 | 0        |
| <i>ITGAM</i>   | 1.65944 | 0        |
| <i>ADRB3</i>   | 1.60324 | 0        |
| <i>KIT</i>     | 1.59277 | 2.18036  |
| <i>GSTM2</i>   | 1.54875 | 0        |
| <i>BGN</i>     | 1.51776 | 1.89442  |

|                 |          |          |
|-----------------|----------|----------|
| <i>ACE</i>      | 1.51531  | 2.12671  |
| <i>CCL1</i>     | 1.48391  | 0        |
| <i>ITGA4</i>    | 1.46196  | 0        |
| <i>CASP7</i>    | 1.44851  | 0        |
| <i>STMN1</i>    | 1.41627  | 1.66908  |
| <i>CD83</i>     | 1.39628  | 0        |
| <i>F2RL1</i>    | 1.38788  | 0        |
| <i>TLR8</i>     | 1.38513  | 0        |
| <i>FCGRT</i>    | 1.36696  | 0        |
| <i>LOX</i>      | 1.34615  | -2.15553 |
| <i>ACOX1</i>    | 1.33438  | 1.39234  |
| <i>PTGS2</i>    | 1.32614  | 0        |
| <i>PPARGC1A</i> | 1.32498  | 1.47731  |
| <i>CYLD</i>     | 1.29265  | 0        |
| <i>EFNA1</i>    | 1.28524  | 0        |
| <i>BIRC2</i>    | 1.14046  | 1.13197  |
| <i>NCAM1</i>    | -1.02438 | -2.08653 |
| <i>CDKN2C</i>   | -1.0849  | 0        |
| <i>DBT</i>      | -1.11953 | 0        |
| <i>PLA2G16</i>  | -1.27425 | 0        |
| <i>TRAF6</i>    | -1.29496 | 0        |
| <i>TNFSF10</i>  | -1.32895 | 0        |
| <i>ECH1</i>     | -1.3302  | 0        |
| <i>DBI</i>      | -1.35529 | -2.33195 |
| <i>CD82</i>     | -1.35712 | 0        |
| <i>BCKDHB</i>   | -1.37294 | -1.78782 |
| <i>HERC1</i>    | -1.39794 | 0        |
| <i>TXNIP</i>    | -1.42883 | 0        |

|                |          |          |
|----------------|----------|----------|
| <i>ARF4</i>    | -1.45088 | -1.74103 |
| <i>CD247</i>   | -1.46004 | -1.97349 |
| <i>LCN2</i>    | -1.50754 | 0        |
| <i>CIB2</i>    | -1.52438 | 0        |
| <i>TPT1</i>    | -1.57261 | -1.15256 |
| <i>HES1</i>    | -1.5843  | 0        |
| <i>CYP1A1</i>  | -1.61685 | 0        |
| <i>VCAM1</i>   | -1.63183 | 0        |
| <i>FGF2</i>    | -1.63355 | 0        |
| <i>PSMA2</i>   | -1.64394 | -2.59416 |
| <i>VIPR2</i>   | -1.67679 | 0        |
| <i>ROBO1</i>   | -1.68618 | 0        |
| <i>IGFBP5</i>  | -1.68912 | -1.35629 |
| <i>RGS2</i>    | -1.71889 | 0        |
| <i>THY1</i>    | -1.73614 | 2.51446  |
| <i>HSD11B1</i> | -1.8109  | 0        |
| <i>ACADM</i>   | -1.8637  | -2.0408  |
| <i>RGS7</i>    | -1.89144 | 0        |
| <i>RARRES2</i> | -1.89277 | -1.48071 |
| <i>IL18</i>    | -1.90189 | 0        |
| <i>PLA2G4A</i> | -1.90356 | -2.40989 |
| <i>ADORA2A</i> | -1.90787 | 0        |
| <i>CH25H</i>   | -1.92944 | 0        |
| <i>RNF149</i>  | -1.92968 | -2.15522 |
| <i>CTNNB1</i>  | -1.93057 | -1.51553 |
| <i>WLS</i>     | -2.09422 | 0        |
| <i>IGFBP6</i>  | -2.09696 | -1.26441 |
| <i>CCL20</i>   | -2.11032 | 0        |

|                |          |          |
|----------------|----------|----------|
| <i>ANGPT2</i>  | -2.11739 | -2.0785  |
| <i>GPD1</i>    | -2.12202 | 0        |
| <i>SCNN1B</i>  | -2.15696 | -2.42077 |
| <i>KITLG</i>   | -2.26762 | 0        |
| <i>ALDH2</i>   | -2.33202 | 0        |
| <i>RNASE4</i>  | -2.34052 | -1.96516 |
| <i>ALAD</i>    | -2.42816 | -1.68142 |
| <i>RND3</i>    | -2.44171 | -1.72475 |
| <i>IL17RD</i>  | -2.45162 | 0        |
| <i>TDRD7</i>   | -2.47031 | -1.59923 |
| <i>LXN</i>     | -2.48021 | 0        |
| <i>PDZD2</i>   | -2.49178 | 0        |
| <i>KRT23</i>   | -2.49771 | -1.93479 |
| <i>ITGB6</i>   | -2.52538 | 0        |
| <i>OCLN</i>    | -2.59521 | 0        |
| <i>CSF2</i>    | -2.70658 | -2.02953 |
| <i>IL1B</i>    | -2.71143 | -4.15226 |
| <i>TFPI</i>    | -2.73683 | -1.77196 |
| <i>SOD1</i>    | -2.78391 | -2.13858 |
| <i>ADAMTS5</i> | -2.80094 | -1.82814 |
| <i>PCSK6</i>   | -2.91087 | 0        |
| <i>SEMA3C</i>  | -2.92051 | -1.92201 |
| <i>OGN</i>     | -2.95231 | 0        |
| <i>CPT1A</i>   | -3.10994 | 0        |
| <i>EMP1</i>    | -3.17009 | 0        |
| <i>DCN</i>     | -3.17218 | -3.62229 |
| <i>LPL</i>     | -3.21357 | -2.33424 |
| <i>PPARA</i>   | -3.23528 | -2.22701 |

|                                                                          |           |                  |
|--------------------------------------------------------------------------|-----------|------------------|
| <i>LAMP3</i>                                                             | -3.29693  | -2.05295         |
| <i>SMURF2</i>                                                            | -3.31064  | 0                |
| <i>DAG1</i>                                                              | -3.3143   | -2.07702         |
| <i>SMURF1</i>                                                            | -3.329    | -2.90496         |
| <i>RASD1</i>                                                             | -3.34956  | 0                |
| <i>AGTR1</i>                                                             | -3.36595  | -1.76157         |
| <i>NEDD9</i>                                                             | -3.59528  | -2.5899          |
| <i>CDO1</i>                                                              | -3.60602  | -3.50987         |
| <i>EGFR</i>                                                              | -3.68555  | -3.0543          |
| <i>DPP4</i>                                                              | -3.89939  | -4.52489         |
| <i>GHR</i>                                                               | -4.83601  | -2.70707         |
| <i>WNT7A</i>                                                             | -5.27012  | -2.26628         |
| <i>CAV1</i>                                                              | -5.47809  | -1.43909         |
| <i>PENK</i>                                                              | -5.62031  | -3.81191         |
| <i>ZNF365</i>                                                            | -7.19321  | -3.59045         |
| <b><i>SDEG involved<br/>in macrophage<br/>activation<br/>network</i></b> |           |                  |
| <i>Symbol</i>                                                            | Untreated | CC-11050 treated |
| <i>CXCL13</i>                                                            | 27.8077   | 5.37504          |
| <i>NFKBID</i>                                                            | 4.81049   | 5.30073          |
| <i>STAT1</i>                                                             | 14.0654   | 5.23444          |
| <i>TLR2</i>                                                              | 9.34011   | 3.80716          |
| <i>CXCL10</i>                                                            | 10.0354   | 3.58632          |
| <i>CYBB</i>                                                              | 14.4262   | 3.38956          |
| <i>CD274</i>                                                             | 5.3788    | 2.54051          |
| <i>IRF7</i>                                                              | 2.30504   | 2.19894          |
| <i>IGJ</i>                                                               | 6.25816   | 2.19384          |

|                                 |         |         |
|---------------------------------|---------|---------|
| <i>KIT</i>                      | 1.59277 | 2.18036 |
| <i>IRF8</i>                     | 3.52603 | 2.00602 |
| <i>LY86</i>                     | 5.85646 | 1.89766 |
| <i>IFNGR2</i>                   | 3.43932 | 1.8924  |
| <i>IL6</i>                      | 11.1379 | 1.84644 |
| <i>B2M</i>                      | 3.3902  | 1.81578 |
| <i>IL6ST</i>                    | 1.50018 | 1.81162 |
| <i>GABRA3</i>                   | 2.13962 | 1.78236 |
| <i>VWF</i>                      | 1.43487 | 1.71411 |
| <i>TRPV2</i>                    | 2.41192 | 1.69712 |
| <i>NOD1</i>                     | 2.57257 | 1.69222 |
| <i>PIGR</i>                     | 1.77355 | 1.58886 |
| <i>ITGAL</i>                    | 3.13904 | 1.49532 |
| <i>CD28</i>                     | 3.62874 | 1.47712 |
| <i>FPR1</i>                     | 11.3865 | 0       |
| <i>SPP1 (includes EG:20750)</i> | 9.57236 | 0       |
| <i>BPIFA1</i>                   | 8.24569 | 0       |
| <i>SPHK1</i>                    | 7.27082 | 0       |
| <i>TNF</i>                      | 7.24064 | 0       |
| <i>TAP1</i>                     | 5.5465  | 0       |
| <i>BID</i>                      | 4.73392 | 0       |
| <i>CD14</i>                     | 4.38048 | 0       |
| <i>IRF5</i>                     | 3.8695  | 0       |
| <i>BIRC3</i>                    | 3.83273 | 0       |
| <i>ITGB2</i>                    | 3.83038 | 0       |
| <i>LTB</i>                      | 3.72229 | 0       |
| <i>RAC2</i>                     | 3.32531 | 0       |



|                                  |          |          |
|----------------------------------|----------|----------|
| <i>IL12B</i>                     | 3.1419   | 0        |
| <i>TIMP1</i>                     | 2.98939  | 0        |
| <i>GRN</i>                       | 2.90628  | 0        |
| <i>CD40</i>                      | 2.88273  | 0        |
| <i>CASP1</i>                     | 2.73833  | 0        |
| <i>TOP2A</i>                     | 2.64811  | 0        |
| <i>CD4</i>                       | 2.16589  | 0        |
| <i>IL16</i>                      | 1.79424  | 0        |
| <i>ITGAM (includes EG:16409)</i> | 1.65944  | 0        |
| <i>IKBKB</i>                     | 1.40326  | 0        |
| <i>CD83</i>                      | 1.39628  | 0        |
| <i>F2RL1</i>                     | 1.38788  | 0        |
| <i>TLR8</i>                      | 1.38513  | 0        |
| <i>PTGS2</i>                     | 1.32614  | 0        |
| <i>CYLD</i>                      | 1.29265  | 0        |
| <i>LTA</i>                       | 1.27459  | 0        |
| <i>TNFSF10</i>                   | -1.32895 | 0        |
| <i>C1QBP</i>                     | -1.44234 | 0        |
| <i>HNRNPD</i>                    | -1.47079 | 0        |
| <i>LCN2</i>                      | -1.50754 | 0        |
| <i>CAV1</i>                      | -5.47809 | -1.43909 |
| <i>RARRES2</i>                   | -1.89277 | -1.48071 |
| <i>LUM</i>                       | -1.86244 | -1.89639 |
| <i>CSF2</i>                      | -2.70658 | -2.02953 |
| <i>LCP1</i>                      | 3.18949  | -2.04624 |
| <i>CBY1</i>                      | -1.75393 | -2.11757 |
| <i>DCLRE1A</i>                   | -2.48055 | -2.38638 |

|                                                                      |           |                  |
|----------------------------------------------------------------------|-----------|------------------|
| <i>TYMS</i>                                                          | -1.94008  | -2.75204         |
| <i>STAT3</i>                                                         | 1.25057   | -2.75316         |
| <i>CCL2</i>                                                          | 1.94896   | -3.0179          |
| <i>DCN</i>                                                           | -3.17218  | -3.62229         |
| <i>IL1B</i>                                                          | -2.71143  | -4.15226         |
| <b><i>SDEG involved<br/>in lung<br/>inflammation<br/>network</i></b> |           |                  |
| <i>Symbol</i>                                                        | Untreated | CC-11050 treated |
| <i>ARG1</i>                                                          | 18.1586   | 0                |
| <i>CYBB</i>                                                          | 14.4262   | 3.38956          |
| <i>STAT1</i>                                                         | 14.0654   | 5.23444          |
| <i>CCL5</i>                                                          | 12.358    | 0                |
| <i>IL6</i>                                                           | 11.1379   | 1.84644          |
| <i>NCF1</i>                                                          | 10.7237   | 2.39023          |
| <i>PLAU</i>                                                          | 9.75851   | 0                |
| <i>SPP1</i>                                                          | 9.57236   | 0                |
| <i>TLR2</i>                                                          | 9.34011   | 3.80716          |
| <i>TNF</i>                                                           | 7.24064   | 0                |
| <i>CD86</i>                                                          | 6.10309   | 0                |
| <i>LGALS3</i>                                                        | 5.74066   | 0                |
| <i>CD40LG</i>                                                        | 4.76094   | 1.87891          |
| <i>BID</i>                                                           | 4.73392   | 0                |
| <i>CTSS</i>                                                          | 4.69755   | 0                |
| <i>PTPRC</i>                                                         | 4.67186   | 1.56613          |
| <i>MS4A1</i>                                                         | 4.65916   | 0                |
| <i>LCP2</i>                                                          | 4.46924   | 0                |
| <i>CD14</i>                                                          | 4.38048   | 0                |

|                  |         |          |
|------------------|---------|----------|
| <i>IFNAR1</i>    | 3.57649 | 1.70404  |
| <i>IFNGR2</i>    | 3.43932 | 1.8924   |
| <i>CLCA1</i>     | 3.39839 | 1.15025  |
| <i>SELP</i>      | 3.2436  | 1.52051  |
| <i>IL12B</i>     | 3.1419  | 0        |
| <i>LIPA</i>      | 3.0335  | -2.00638 |
| <i>TIMP1</i>     | 2.98939 | 0        |
| <i>ENTPD1</i>    | 2.9056  | 1.5757   |
| <i>CIITA</i>     | 2.80008 | 0        |
| <i>CASP1</i>     | 2.73833 | 0        |
| <i>TOP2A</i>     | 2.64811 | 0        |
| <i>NOD1</i>      | 2.57257 | 1.69222  |
| <i>TNFAIP8L2</i> | 2.52363 | 0        |
| <i>GPC3</i>      | 2.50629 | 3.426    |
| <i>TNFSF15</i>   | 2.37462 | 1.58851  |
| <i>TGFB1</i>     | 2.34997 | 2.09126  |
| <i>PDGFRA</i>    | 2.23633 | 0        |
| <i>TPI1</i>      | 2.19757 | 0        |
| <i>MTOR</i>      | 2.18113 | 1.96763  |
| <i>CD4</i>       | 2.16589 | 0        |
| <i>IL4R</i>      | 2.14877 | 0        |
| <i>CTLA4</i>     | 2.10674 | 0        |
| <i>MAP2K1</i>    | 2.10336 | 2.1419   |
| <i>NBR1</i>      | 2.09089 | 0        |
| <i>TNFRSF9</i>   | 2.06428 | 0        |
| <i>CCR1</i>      | 2.06133 | 0        |
| <i>CASP3</i>     | 2.04918 | 1.68297  |
| <i>GIT2</i>      | 1.98891 | 0        |

|                 |          |          |
|-----------------|----------|----------|
| <i>IGF1</i>     | 1.96856  | 1.99985  |
| <i>CCL2</i>     | 1.94896  | -3.0179  |
| <i>CRP</i>      | 1.90823  | 1.77819  |
| <i>IL16</i>     | 1.79424  | 0        |
| <i>TANK</i>     | 1.77772  | 0        |
| <i>KIT</i>      | 1.59277  | 2.18036  |
| <i>CBL</i>      | 1.56745  | 0        |
| <i>SLC6A2</i>   | 1.55024  | 1.65     |
| <i>ITK</i>      | 1.53474  | 0        |
| <i>RORA</i>     | 1.47585  | 0        |
| <i>ADA</i>      | 1.45241  | 0        |
| <i>IKBKB</i>    | 1.40326  | 0        |
| <i>F2RL1</i>    | 1.38788  | 0        |
| <i>NFE2L2</i>   | 1.38277  | 0        |
| <i>FCGRT</i>    | 1.36696  | 0        |
| <i>PTGS2</i>    | 1.32614  | 0        |
| <i>CYLD</i>     | 1.29265  | 0        |
| <i>LTA</i>      | 1.27459  | 0        |
| <i>PPP3CB</i>   | -1.23811 | 0        |
| <i>LUC7L3</i>   | -1.23856 | 0        |
| <i>FBN1</i>     | -1.27844 | 0        |
| <i>INSIG1</i>   | -1.28992 | -1.92175 |
| <i>TRAF6</i>    | -1.29496 | 0        |
| <i>TNFRSF1A</i> | -1.3672  | 0        |
| <i>FOXA2</i>    | -1.41504 | 0        |
| <i>FOXO3</i>    | -1.47902 | 0        |
| <i>TRAF3IP2</i> | -1.49289 | 0        |
| <i>SELL</i>     | -1.49725 | -1.84906 |

|                 |          |          |
|-----------------|----------|----------|
| <i>NEO1</i>     | -1.52892 | 0        |
| <i>BCR</i>      | -1.54105 | 0        |
| <i>PPP3CA</i>   | -1.5581  | -1.91243 |
| <i>NR3C1</i>    | -1.60672 | 1.25902  |
| <i>DUSP1</i>    | -1.86747 | 0        |
| <i>IL18</i>     | -1.90189 | 0        |
| <i>PLA2G4A</i>  | -1.90356 | -2.40989 |
| <i>ADORA2A</i>  | -1.90787 | 0        |
| <i>IL12A</i>    | -1.91473 | 0        |
| <i>SELENBP1</i> | -2.02197 | -1.98049 |
| <i>LDLR</i>     | -2.0712  | -1.40861 |
| <i>ANXA5</i>    | -2.1427  | -1.90766 |
| <i>F2</i>       | -2.28177 | 0        |
| <i>ALDH2</i>    | -2.33202 | 0        |
| <i>ITGB6</i>    | -2.52538 | 0        |
| <i>VEGFA</i>    | -2.59968 | -1.27549 |
| <i>CSF2</i>     | -2.70658 | -2.02953 |
| <i>IL1B</i>     | -2.71143 | -4.15226 |
| <i>TFPI</i>     | -2.73683 | -1.77196 |
| <i>IL4</i>      | -2.77449 | -2.23974 |
| <i>SCGB1A1</i>  | -3.03608 | -2.70236 |
| <i>AGTR1</i>    | -3.36595 | -1.76157 |
| <i>PRDX6</i>    | -3.44223 | -2.49206 |
| <i>ALB</i>      | -3.50069 | 0        |
| <i>ANXA3</i>    | -4.09888 | -2.94295 |
| <i>TAC1</i>     | -4.62156 | -3.50564 |
| <i>CAV1</i>     | -5.47809 | -1.43909 |
| <i>CCL11</i>    | -5.99061 | -2.5123  |

| <b>Common SDEG involved in TNF-<math>\alpha</math>, macrophage activation and lung inflammation networks</b> |           |                  |
|--------------------------------------------------------------------------------------------------------------|-----------|------------------|
| <i>Symbol</i>                                                                                                | Untreated | CC-11050 treated |
| <i>CYBB</i>                                                                                                  | 14.4262   | 3.38956          |
| <i>STAT1</i>                                                                                                 | 14.0654   | 5.23444          |
| <i>IL6</i>                                                                                                   | 11.1379   | 1.84644          |
| <i>TLR2</i>                                                                                                  | 9.34011   | 3.80716          |
| <i>TNF</i>                                                                                                   | 7.24064   | 0                |
| <i>BID</i>                                                                                                   | 4.73392   | 0                |
| <i>CD14</i>                                                                                                  | 4.38048   | 0                |
| <i>IFNGR2</i>                                                                                                | 3.43932   | 1.8924           |
| <i>IL12B</i>                                                                                                 | 3.1419    | 0                |
| <i>TIMP1</i>                                                                                                 | 2.98939   | 0                |
| <i>CASP1</i>                                                                                                 | 2.73833   | 0                |
| <i>CD4</i>                                                                                                   | 2.16589   | 0                |
| <i>CCL2</i>                                                                                                  | 1.94896   | -3.0179          |
| <i>IL16</i>                                                                                                  | 1.79424   | 0                |
| <i>KIT</i>                                                                                                   | 1.59277   | 2.18036          |
| <i>F2RL1</i>                                                                                                 | 1.38788   | 0                |
| <i>PTGS2</i>                                                                                                 | 1.32614   | 0                |
| <i>CYLD</i>                                                                                                  | 1.29265   | 0                |
| <i>CSF2</i>                                                                                                  | -2.70658  | -2.02953         |
| <i>IL1B</i>                                                                                                  | -2.71143  | -4.15226         |
| <i>CAV1</i>                                                                                                  | -5.47809  | -1.43909         |

| <b>SDEG involved in lung fibrosis network in rabbits at 12 weeks post infection</b> |                  |                |
|-------------------------------------------------------------------------------------|------------------|----------------|
| <b>Symbol</b>                                                                       | <b>Untreated</b> | <b>CC11050</b> |
| ARG1                                                                                | 18.16            | 0.00           |
| STAT1                                                                               | 14.07            | 5.23           |
| IL6                                                                                 | 11.14            | 1.85           |
| NCF1                                                                                | 10.72            | 2.39           |
| PLAU                                                                                | 9.76             | 0.00           |
| SPP1                                                                                | 9.57             | 0.00           |
| CTSK                                                                                | 8.08             | 0.00           |
| SPHK1                                                                               | 7.27             | 0.00           |
| TNF                                                                                 | 7.24             | 0.00           |
| LGALS3                                                                              | 5.74             | 0.00           |
| HCK                                                                                 | 4.97             | 0.00           |
| CD40LG                                                                              | 4.76             | 1.88           |
| BID                                                                                 | 4.73             | 0.00           |
| HLA-DRA                                                                             | 4.49             | 2.50           |
| IFNGR2                                                                              | 3.44             | 0.00           |
| SELP                                                                                | 3.24             | 0.00           |
| IL12B                                                                               | 3.14             | 0.00           |
| IL22                                                                                | 3.11             | 0.00           |
| ENTPD1                                                                              | 2.91             | 0.00           |
| SERPINE1                                                                            | 2.63             | 3.61           |
| IL7                                                                                 | 2.42             | 0.00           |
| COL3A1                                                                              | 2.42             | 2.99           |
| TGFB1                                                                               | 2.35             | 2.09           |

|                 |       |       |
|-----------------|-------|-------|
| <i>PDGFRA</i>   | 2.24  | 0.00  |
| <i>CXCL12</i>   | 2.14  | 0.00  |
| <i>IGF1</i>     | 1.97  | 0.00  |
| <i>KIT</i>      | 1.59  | 2.18  |
| <i>ITGA5</i>    | 1.57  | 0.00  |
| <i>TSTA3</i>    | 1.50  | 0.00  |
| <i>ADA</i>      | 1.45  | 0.00  |
| <i>IKBKB</i>    | 1.40  | 0.00  |
| <i>TOP1</i>     | 1.40  | 1.31  |
| <i>LOX</i>      | 1.35  | 0.00  |
| <i>PTGS2</i>    | 1.33  | 0.00  |
| <i>HMGA2</i>    | 1.32  | 0.00  |
| <i>FOXM1</i>    | 1.27  | 0.00  |
| <i>PDE5A</i>    | 0.00  | 1.60  |
| <i>IL1RN</i>    | 0.00  | -1.58 |
| <i>RET</i>      | -1.08 | 0.00  |
| <i>TNFRSF1A</i> | -1.37 | 0.00  |
| <i>PIK3CB</i>   | -1.45 | -1.62 |
| <i>SELL</i>     | -1.50 | 0.00  |
| <i>BCR</i>      | -1.54 | 0.00  |
| <i>NR3C1</i>    | -1.61 | 0.00  |
| <i>THY1</i>     | -1.74 | 0.00  |
| <i>SCGB3A2</i>  | -1.89 | 0.00  |
| <i>TGFA</i>     | -1.90 | 0.00  |
| <i>PLA2G4A</i>  | -1.90 | -2.41 |
| <i>ADORA2A</i>  | -1.91 | 0.00  |
| <i>IL12A</i>    | -1.91 | 0.00  |
| <i>ARG2</i>     | -1.99 | 0.00  |



|              |       |       |
|--------------|-------|-------|
| <i>IL23A</i> | -2.18 | 0.00  |
| <i>FGFR2</i> | -2.49 | 0.00  |
| <i>CSF2</i>  | -2.71 | -2.03 |
| <i>IL1B</i>  | -2.71 | -4.15 |
| <i>IL4</i>   | -2.77 | -2.24 |
| <i>TGFB2</i> | -3.34 | -3.23 |
| <i>AGTR1</i> | -3.37 | 0.00  |
| <i>CAV1</i>  | -5.48 | 0.00  |
